# Supplementary material
Source: Springer Nature journal article supplement (https://www.springermedizin.de/resource/supplementary/12955_2005_226_MOESM1_ESM.pdf/9559942)

A. pSF-12 Physical Component Scores

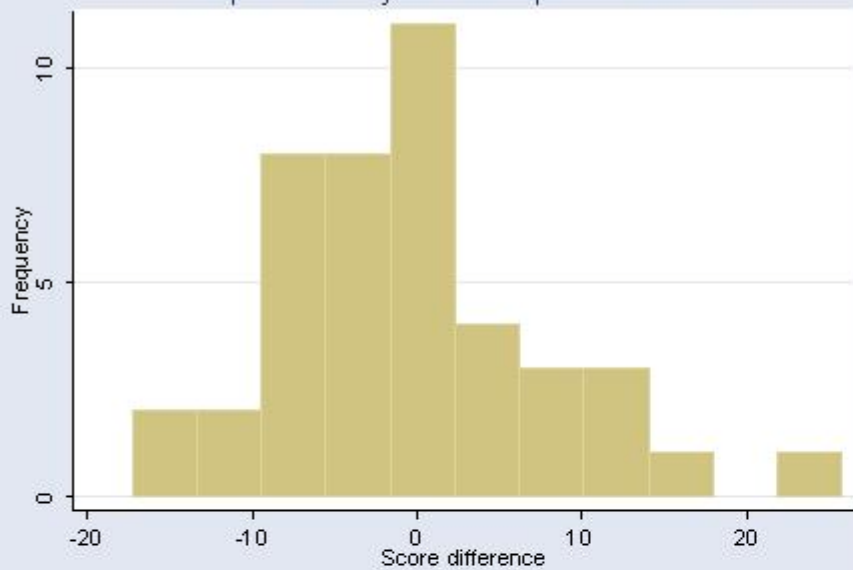

B. pUI score

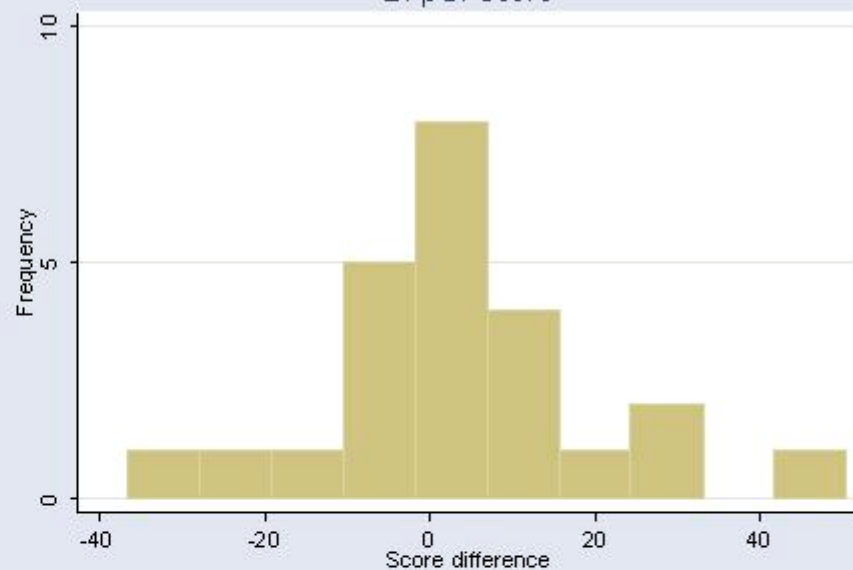

B. Falls Efficacy Scale score

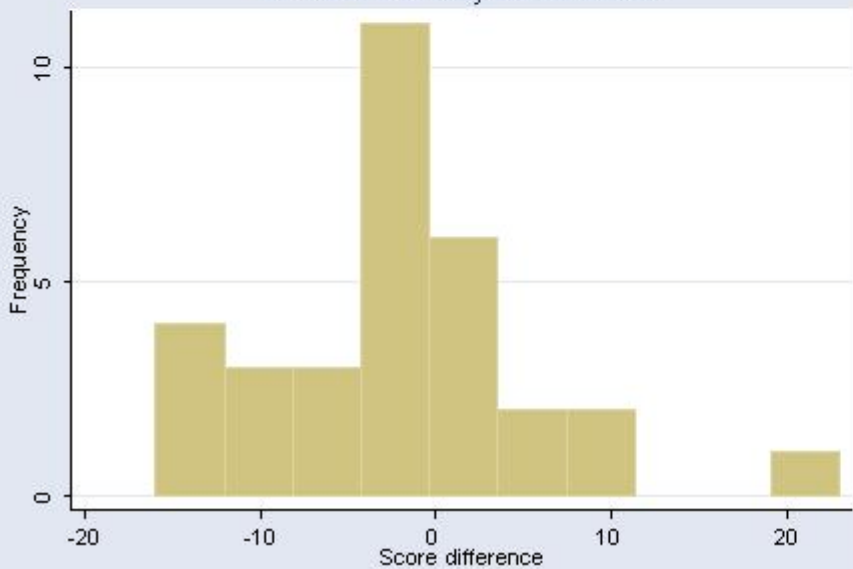

Supplement: MOESM1 [file 9559942]
